# Supplementary material for: Superior high-rate capability of Na3(VO0.5)2(PO4)2F2 nanoparticles embedded in porous graphene through the pseudocapacitive effect
Source: Royal Society of Chemistry journal article supplement (doi:10.1039/c6cc00065g), 2016-01-01
Supplement: c6cc00065g1.pdf [file c6cc00065g1.pdf]

## Supporting Information

### **Superior high-rate capability of $\text{Na}_3(\text{VO}_{0.5})_2(\text{PO}_4)_2\text{F}_2$ nanoparticles embedded in porous graphene through pseudocapacitive effect**

Xingde Xiang, Qiongqiong Lu, Mo Han, and Jun Chen\*

#### **S1. Experimental section**

##### **S1.1. Materials synthesis**

Graphene oxide (GO) solution ( $8.3 \text{ mg ml}^{-1}$ ) was firstly prepared through oxidizing graphite powder with a modified Hummers method.<sup>1, 2</sup>

The  $\text{Na}_3(\text{VO}_{0.5})_2(\text{PO}_4)_2\text{F}_2/\text{graphene}$  was synthesized by using a sample solid-state route, with an initial molar ratio (3: 2: 2: 3) of Na, V, P, and F elements in starting materials. Typically, 0.5 g vanadium pentoxide ( $\text{V}_2\text{O}_5$ , 99%) and 1.04 g oxalate dehydrate ( $\text{H}_2\text{C}_2\text{O}_4 \cdot 2\text{H}_2\text{O}$ , 99.5%) were added into 40 ml distilled water. The suspension was covered with a plastic-film and then magnetically stirred at  $80^\circ\text{C}$  until transparent  $\text{VOC}_2\text{O}_4$  was formed. 0.633 g ammonium dihydrogen phosphate ( $\text{NH}_4\text{H}_2\text{PO}_4$ , 99%) and GO solution with required amount were added. After 10 minutes, the solution was evaporated and further dried at  $80^\circ\text{C}$  overnight to produce the mixture of  $\text{VOC}_2\text{O}_4$ ,  $\text{NH}_4\text{H}_2\text{PO}_4$  and reduced graphene oxide. After sufficiently ground by hand, the powder mixture was transferred into a furnace with Ar-fluxing and treated at  $350^\circ\text{C}$  for 4 h and at  $650^\circ\text{C}$  for 6 h to form vanadium phosphates precursor. Desired  $\text{Na}_3(\text{VO}_{0.5})_2(\text{PO}_4)_2\text{F}_2/\text{graphene}$  was finally obtained by reacting the precursor with sodium fluoride ( $\text{NaF}$ , 0.37 g, 98%) in Ar atmosphere at  $600^\circ\text{C}$  for 2 h. In order to investigate the effect of GO dosage on particle size, specific area and pore volume of the  $\text{Na}_3(\text{VO}_{0.5})_2(\text{PO}_4)_2\text{F}_2/\text{graphene}$ , various GO dosages (0 ml, 5 ml, 10 ml, 15 ml) were utilized, and corresponding products were respectively denoted as NVPF-0ml (pristine

$\text{Na}_3(\text{VO}_{0.5})_2(\text{PO}_4)_2\text{F}_2$  in manuscript), NVPF-5ml, NVPF-10ml, and NVPF-15ml ( $\text{Na}_3(\text{VO}_{0.5})_2(\text{PO}_4)_2\text{F}_2/\text{graphene}$  in manuscript).

### **S1.2. Materials characterization**

The structures of the materials were analyzed with X-ray diffraction (Rigaku MiniFlex600, Cu  $K\alpha$  radiation). The morphology was observed by using field-emission scanning electron microscopy (SEM, JEOL JSM7500F), transmission electron microscopy (TEM, JEOL 2100F), and  $\text{N}_2$  adsorption/desorption measurement (BELSORP-mini instrument, 77 K). The actual composition was estimated by using ICP analysis and EDX measurements. The EDX measurement was undertaken at a selected area.

### **S1.3. Electrochemical measurements**

The cathode electrode was fabricated by coating an uniform slurry of 70 wt% active material ( $\text{Na}_3(\text{VO}_{0.5})_2(\text{PO}_4)_2\text{F}_2/\text{graphene}$ ), 20 wt% conductive agent (Super P carbon) and 10 wt% binder (polyvinylidene fluoride, PVDF) onto an Al foil. The electrode loading of the active materials is  $1.1\sim 1.2\text{ mg cm}^{-2}$ . 2032-type cells was assembled by using Na metal as the anode, glass fiber as the separator and 1 M  $\text{NaClO}_4/\text{EC-PC}$  (1: 1, v/v, 5 wt% FEC) as the electrolyte. The electrochemical performance was measured with galvanostatic charge and discharge on Land test system. The cyclic voltammetry was performed on the same electrode one after the other at various scanning rates. The electrochemical impedance spectra were measured at 3.7 V in the frequency range of 100 kHz and 10 mHz, with an amplitude of 10 mV.

## **S2. Synthesis optimization**

In this work, our target is to synthesize nanosized NVPF particles embedded in porous graphene as superior cathode material for sodium-ion batteries. The nanosizing of the NVPF crystals can shorten the diffusion pathway and increase the diffusion interface of  $\text{Na}^+$  ions, while the porous graphene can enhance the electrolyte infiltration and electron conductivity of

the material. However, too much graphene would sacrifice the specific capacity of the NVPF/graphene material owing to the electrochemical inactivity of the graphene at high potentials ( $>2.0$  V *vs* Na<sup>+</sup>/Na). Hence, we design the particle size as the primary parameter for optimizing the material synthesis.

### S2.1. Effect of GO dosage on particle size

**Figure S1** shows XRD patterns of NVPF-0ml, NVPF-5ml, NVPF-10ml, and NVPF-15ml samples. As observed, the peak positions are not changed with altering the GO dosage, suggesting that the GO dosage has no influence on crystal structure of the materials. It should be mentioned that the peaks are continuously broadened with increasing the GO dosage possibly due to reduction of particle size. In order to confirm the reduction, their particle sizes have been estimated by using Scherrer equation:  $d = k\lambda / \beta \cos \theta$ , where  $d$  is the particle size (nm),  $k$  is Scherrer constant (0.89),  $\lambda$  is the wavelength (0.154056 nm) of X-ray,  $\beta$  is the peak width (rad) at half height, and  $\theta$  is the scattering angle. Here, the (222) peak is chosen for the calculation owing to no overlap with other peaks, and the calculated results are listed in **Table S1**. Obviously, the GO addition reduces the size of the NVPF particles. However, the particle size can't be further reduced when the dosage increases to 15 ml. Hence, the 15 ml is considered to be the optimum GO dosage, equivalent to 0.25 g GO per 1 g V<sub>2</sub>O<sub>5</sub> precursor.

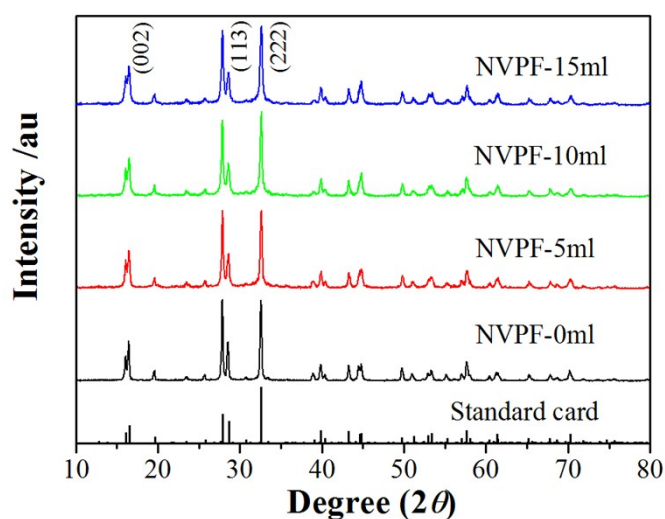

**Figure S1.** XRD patterns of NVPF-0ml, NVPF-5ml, NVPF-10ml and NVPF-15ml.

**Table S1** Calculated particle size of those NVPF samples based on Scherrer equation.

| Sample    | $2\theta$ for (222) peak | HWHM               | Particle size |
|-----------|--------------------------|--------------------|---------------|
| NVPF-0ml  | $32.6^\circ$             | $\sim 0.182^\circ$ | $\sim 45$ nm  |
| NVPF-5ml  | $32.6^\circ$             | $\sim 0.232^\circ$ | $\sim 35$ nm  |
| NVPF-10ml | $32.6^\circ$             | $\sim 0.256^\circ$ | $\sim 32$ nm  |
| NVPF-15ml | $32.6^\circ$             | $\sim 0.274^\circ$ | $\sim 30$ nm  |

### S2.2. Effect of GO dosage on material morphology

**Figure S2** shows the SEM images of NVPF-0ml, NVPF-5ml, NVPF-10ml, and NVPF-15ml samples. As observed, the NVPF prepared without GO addition is composed of large aggregates. With increasing GO dosage, the particles are being dispersed, and the graphene network is being increased.

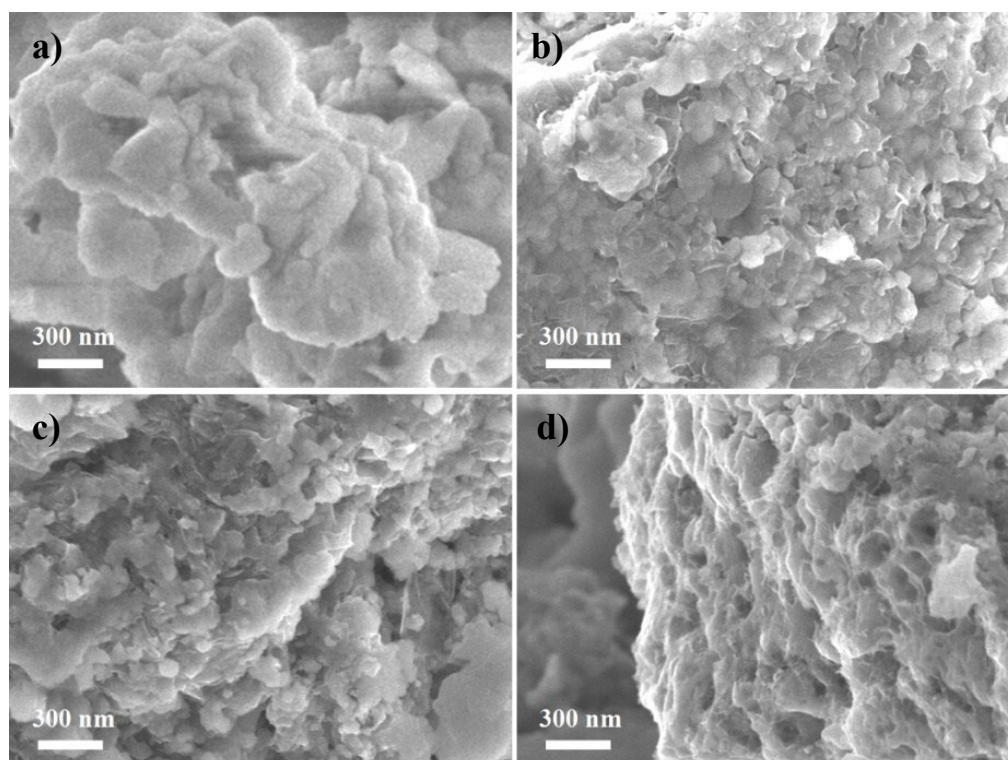

**Figure S2.** SEM images of a) NVPF-0ml, b) NVPF-5ml, c) NVPF-10ml, and d) NVPF-15ml.

### S2.3. Effect of GO dosage on specific area and pore volume

Figure S3 shows the N<sub>2</sub>-adsorption/desorption curves of NVPF-0ml, NVPF-5ml, NVPF-10ml, and NVPF-15ml samples. As seen, the NVPF prepared without GO addition has a small specific area and a negligible pore volume. With increasing the GO dosage, the specific area and pore volume significantly increase due to reduction of NVPF particle size and increase of graphene network. Although NVPF-10ml and NVPF-15ml samples have similar particle sizes, the specific area and pore volume of NVPF-15ml sample are much larger than those of NVPF-10ml sample owing to increase of graphene content. In addition, the pore diameter is not changed with altering the GO dosage, suggesting that the pore in the materials mainly originates from the graphene network.

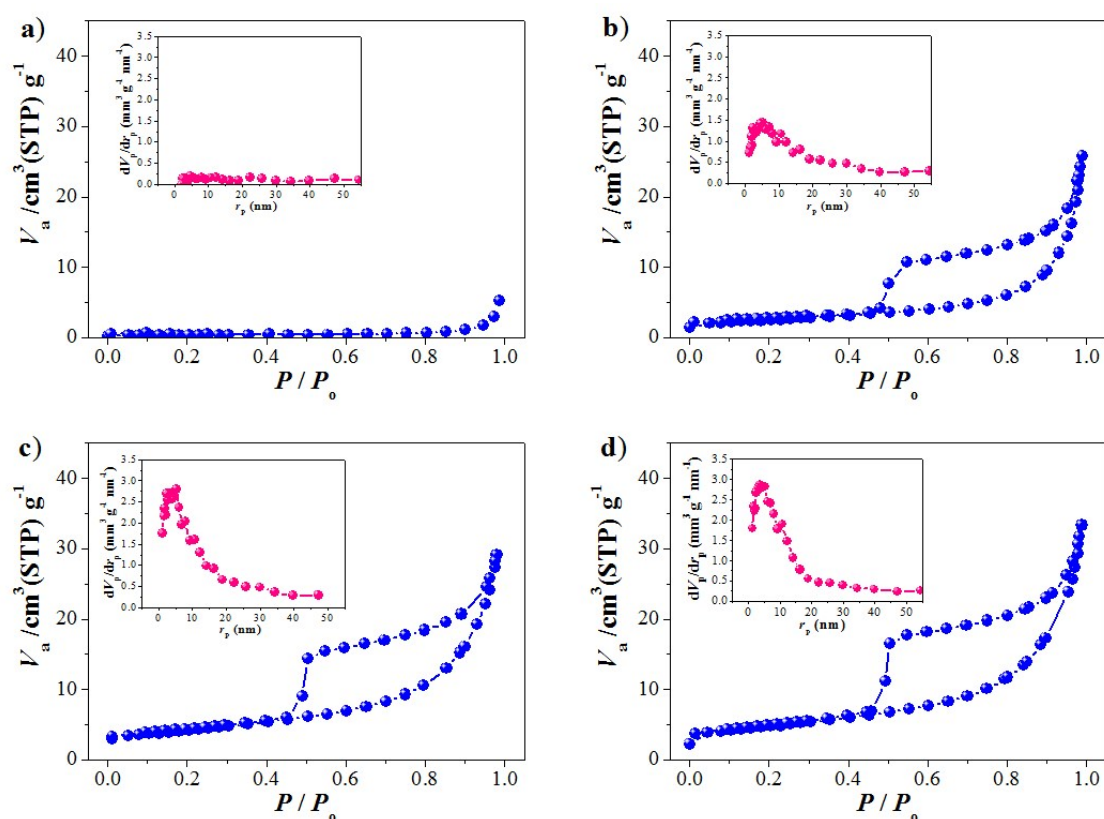

**Figure S3.** N<sub>2</sub>-adsorption/desorption curves and pore distributions (inset) of a) NVPF-0ml, b) NVPF-5ml, c) NVPF-10ml, and d) NVPF-15ml.

**Table S2.** Specific areas and pore volumes of those samples

| Sample    | BET area / m <sup>2</sup> g <sup>-1</sup> | Pore volume / m <sup>3</sup> g <sup>-1</sup> |
|-----------|-------------------------------------------|----------------------------------------------|
| NVPF-0ml  | ~1.34                                     | ~0.31                                        |
| NVPF-5ml  | ~8.57                                     | ~1.97                                        |
| NVPF-10ml | ~14.6                                     | ~3.34                                        |
| NVPF-15ml | ~16.5                                     | ~3.78                                        |

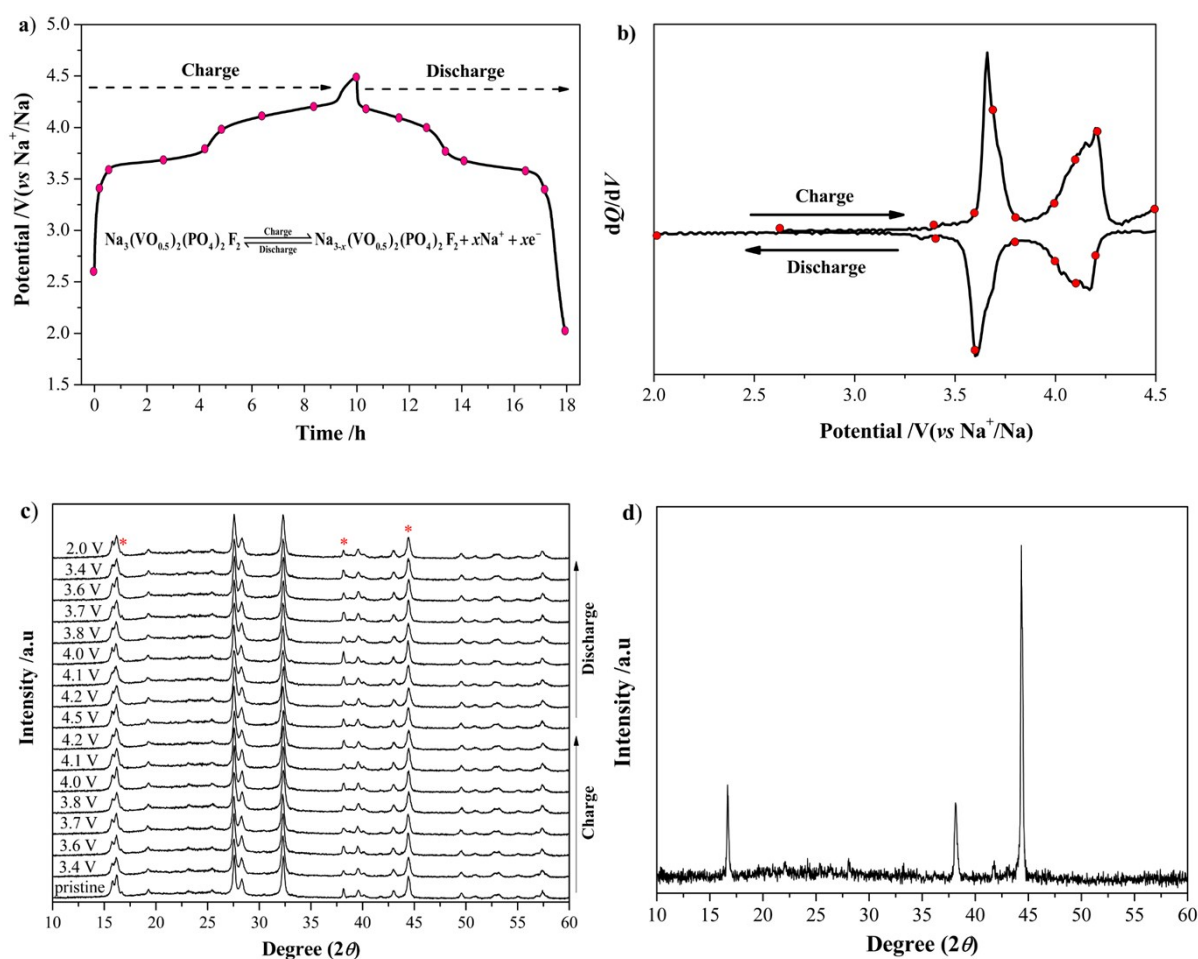

**Figure S4.** Reaction mechanism of the  $\text{Na}_3(\text{VO}_{0.5})_2(\text{PO}_4)_2\text{F}_2/\text{graphene}$ : a) charge/discharge curves, b)  $dQ/dV$  curves, c) ex-situ XRD profiles at various states of charge/discharge (the

asterisk represents the background peaks belonging to Al foil/adhesive), and d) XRD profile of Al foil/adhesive.

### S3. Charge/discharge properties

#### S3.1. Reaction mechanism

In order to investigate the reaction mechanism of the  $\text{Na}_3(\text{VO}_{0.5})_2(\text{PO}_4)_2\text{F}_2/\text{graphene}$  during charge/discharge process, we have tested its charge/discharge curves at a relatively low current rate of 0.1 C and identified the main reaction regions. As seen from the  $dQ/dV$  curve shown in **Figure S4b**, there are one couple of weak peaks ( $\sim 3.4$  V) and two couples of strong peaks ( $\sim 3.65$  V and  $\sim 4.1$  V) for oxidation/reduction of vanadium. **Figure S4c** shows the ex-situ XRD of the material at various states of charge/discharge (corresponding to the 17 points in **Figure S4a** and **Figure S4b**). As observed, with altering the state of charge/discharge, the  $\text{Na}_3(\text{VO}_{0.5})_2(\text{PO}_4)_2\text{F}_2/\text{graphene}$  material does not exhibit disappearance of original peaks and appearance of new peaks. This suggests that the NVPF/graphene material undergoes a single-phase reaction during Na deintercalation/intercalation, consistent with previous reports on the  $\text{Na}_3(\text{VO})_2(\text{PO}_4)_2\text{F}$  and  $\text{Na}_3\text{V}_2(\text{PO}_4)_2\text{F}_3$  materials.<sup>3, 4</sup> The appearance of three plateaus during the single-phase reaction can be attributed to the rearrangement of Na ions at Na1 site and Na2 site with deintercalation/intercalation of Na ions, which does not change the overall crystal structure. As proposed by Dunn' group,<sup>5</sup> the structure that doesn't undergo phase transformation during ion intercalation is an important design rule for intercalation pseudocapacitance.

#### S3.2. Cycling performance

**Figure S5a** shows the differential curves ( $dQ/dV$ ) of the  $\text{Na}_3(\text{VO}_{0.5})_2(\text{PO}_4)_2\text{F}_2/\text{graphene}$ . As seen, those redox peaks don't show observable change with extended cycling, implying highly reversible Na deintercalation/intercalation process. As exhibited in **Figure S5b**, the

$\text{Na}_3(\text{VO}_{0.5})_2(\text{PO}_4)_2\text{F}_2/\text{graphene}$  material shows a reversible capacity of  $100 \text{ mAh g}^{-1}$  at the first cycle and retains a capacity of  $91 \text{ mAh g}^{-1}$  after 200 cycles. The capacity retention is 91%, much higher than that of the pristine  $\text{Na}_3(\text{VO}_{0.5})_2(\text{PO}_4)_2\text{F}_2$ . With an aim to understand the improved cycling performance, we have investigated the crystal structure of the cycled materials. As compared in **Figure S6**, the pristine  $\text{Na}_3(\text{VO}_{0.5})_2(\text{PO}_4)_2\text{F}_2$  exhibits obvious shift of XRD peaks, while the  $\text{Na}_3(\text{VO}_{0.5})_2(\text{PO}_4)_2\text{F}_2/\text{graphene}$  material doesn't show any observable shift. The result suggests that the  $\text{Na}_3(\text{VO}_{0.5})_2(\text{PO}_4)_2\text{F}_2/\text{graphene}$  material has an enhanced structural stability possibly due to the carbon coating that protects the active  $\text{Na}_3(\text{VO}_{0.5})_2(\text{PO}_4)_2\text{F}_2$  from side reaction with electrolytes. In addition, as seen from **Figure S7**, the cycled  $\text{Na}_3(\text{VO}_{0.5})_2(\text{PO}_4)_2\text{F}_2/\text{graphene}$  material still keeps the particle size of about 30 nm and the (002) spacing of  $\sim 0.53 \text{ nm}$ , further confirming the good structural and morphological stabilities.

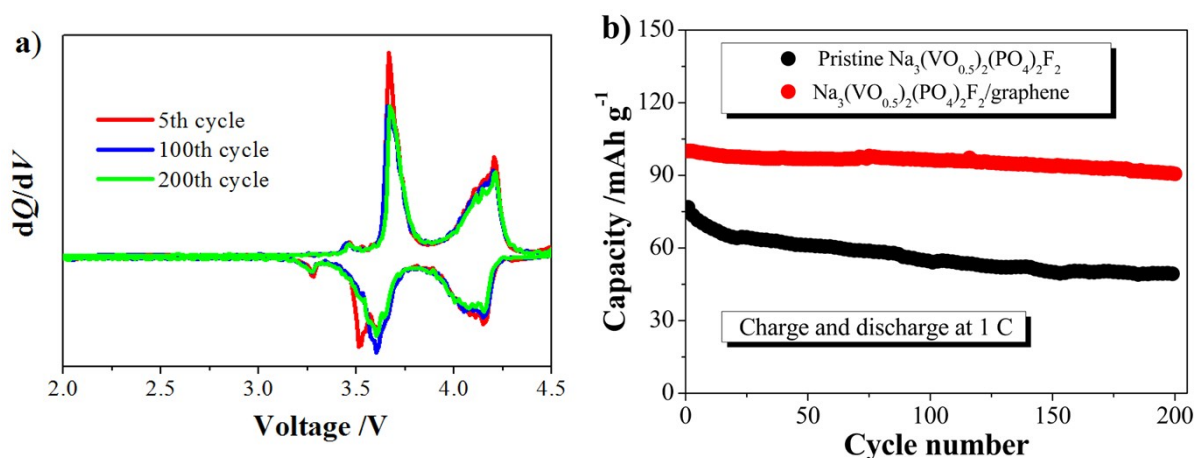

**Figure S5.** a)  $dQ/dV$  profiles of the  $\text{Na}_3(\text{VO}_{0.5})_2(\text{PO}_4)_2\text{F}_2/\text{graphene}$ , and b) variations of discharge capacity vs cycle number of the  $\text{Na}_3(\text{VO}_{0.5})_2(\text{PO}_4)_2\text{F}_2/\text{graphene}$  and  $\text{Na}_3(\text{VO}_{0.5})_2(\text{PO}_4)_2\text{F}_2$  at a charge/discharge rate of 1 C.



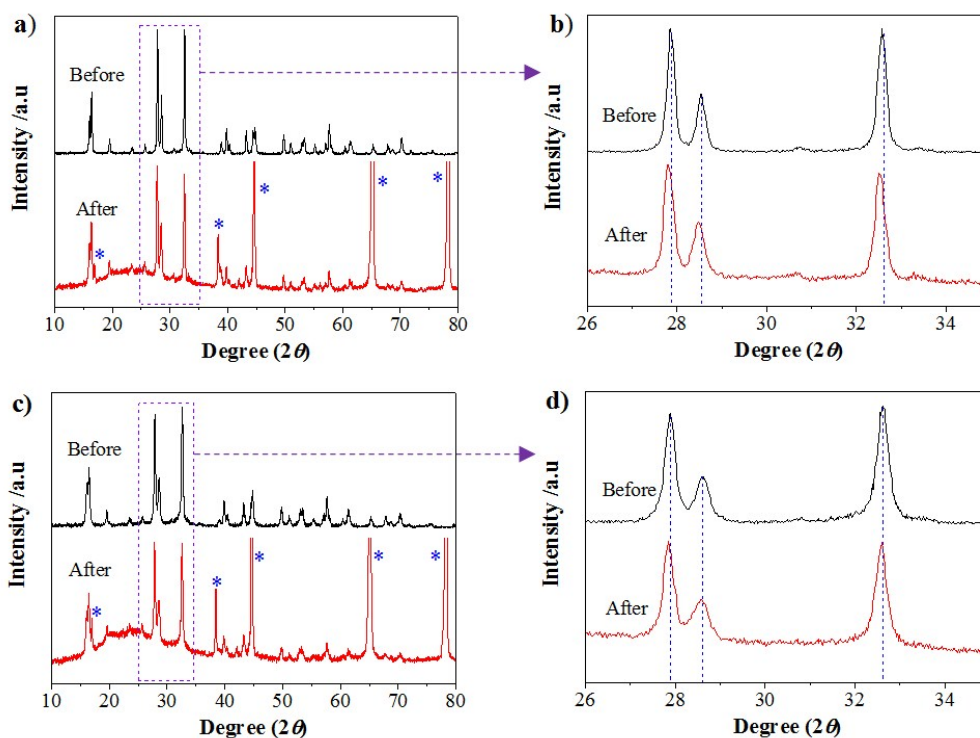

**Figure S6.** a-b) XRD patterns of the  $\text{Na}_3(\text{VO}_{0.5})_2(\text{PO}_4)_2\text{F}_2$  before and after cycling 200 cycles, and c-d) XRD patterns of the  $\text{Na}_3(\text{VO}_{0.5})_2(\text{PO}_4)_2\text{F}_2/\text{graphene}$  before and after cycling 200 cycles. (The “\*” symbol represents the background peaks from Al foil and adhesive).

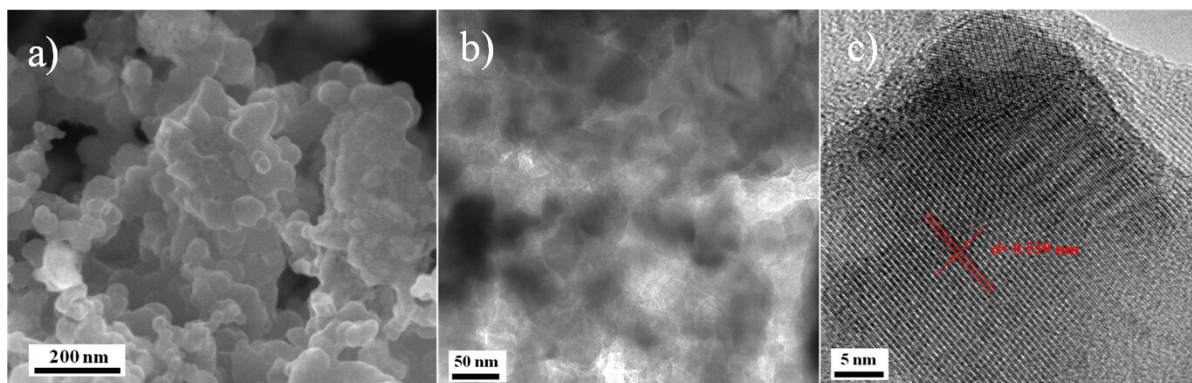

**Figure S7.** a) SEM image and b, c) TEM images of the cycled  $\text{Na}_3(\text{VO}_{0.5})_2(\text{PO}_4)_2\text{F}_2/\text{graphene}$ .

### S3.3. Rate performance

#### S3.3.1. Discharge capacities at various C-rates

**Figure S8** presents the discharge curves and Coulombic efficiency of the  $\text{Na}_3(\text{VO}_{0.5})_2(\text{PO}_4)_2\text{F}_2$  and  $\text{Na}_3(\text{VO}_{0.5})_2(\text{PO}_4)_2\text{F}_2/\text{graphene}$  at various C-rates. As exhibited, the GO addition

significantly enhances the stability in the high-rate capability and coulombic efficiency, due to facilitation of reaction kinetics.

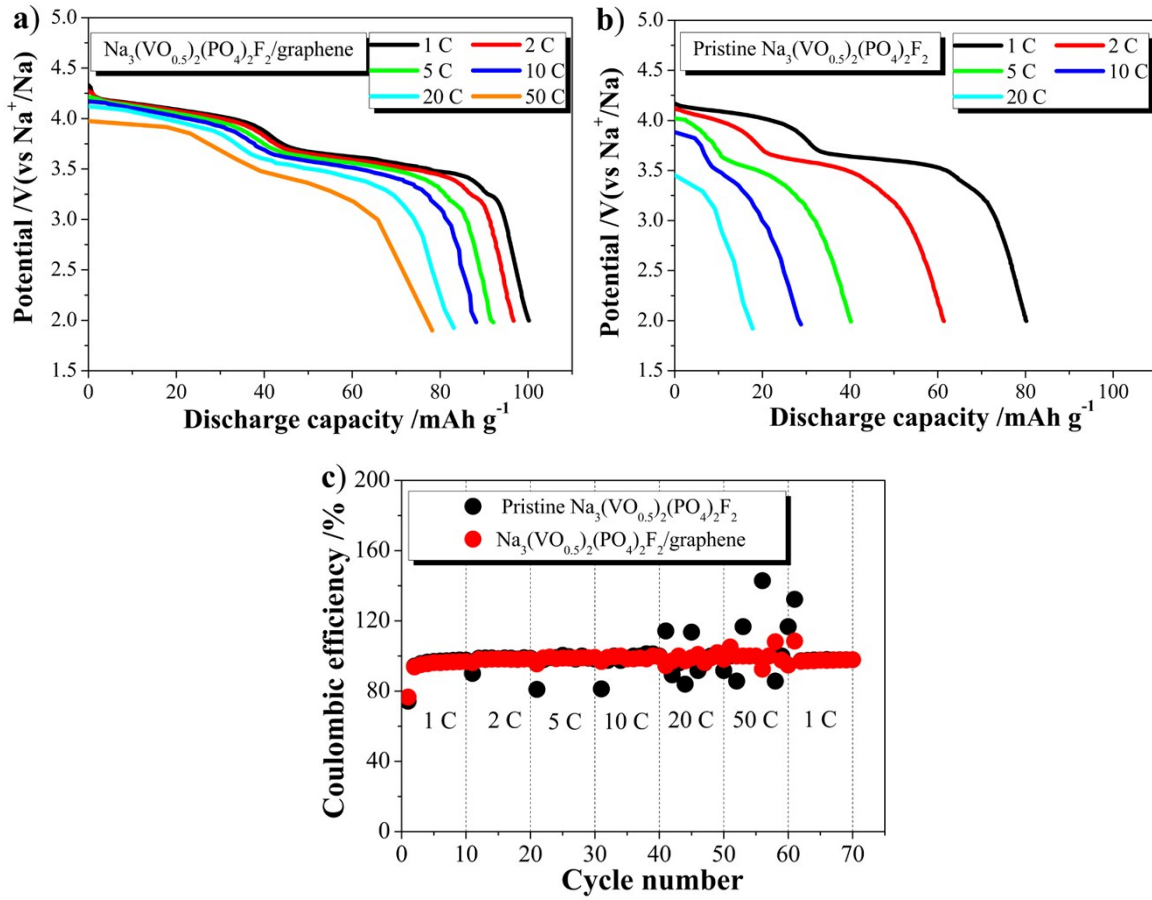

**Figure S8.** Discharge curves at various C-rates (a, b) and Coulombic efficiency (c) of the  $\text{Na}_3(\text{VO}_{0.5})_2(\text{PO}_4)_2\text{F}_2/\text{graphene}$  and  $\text{Na}_3(\text{VO}_{0.5})_2(\text{PO}_4)_2\text{F}_2$ .

### S3.3.2. Reaction kinetics

**Figure S9** shows the cyclic voltammograms of the  $\text{Na}_3(\text{VO}_{0.5})_2(\text{PO}_4)_2\text{F}_2$  and  $\text{Na}_3(\text{VO}_{0.5})_2(\text{PO}_4)_2\text{F}_2/\text{graphene}$  at various scanning rates ( $0.1 \text{ mV s}^{-1}$ ,  $0.2 \text{ mV s}^{-1}$ ,  $0.3 \text{ mV s}^{-1}$ ,  $0.5 \text{ mV s}^{-1}$ ,  $0.7 \text{ mV s}^{-1}$ , and  $1.0 \text{ mV s}^{-1}$ ). According to the equation (1), it is found that the pristine  $\text{Na}_3(\text{VO}_{0.5})_2(\text{PO}_4)_2\text{F}_2$  exhibits  $b$  values of close to 0.5, suggesting a diffusion-controlled reaction process, while the  $\text{Na}_3(\text{VO}_{0.5})_2(\text{PO}_4)_2\text{F}_2/\text{graphene}$  shows the  $b$  values of close to 1.0, indicating that the reaction process is dominated by capacitive effect.

Respective contributions of diffusion-controlled reaction and capacitive effect to the peak currents of the  $\text{Na}_3(\text{VO}_{0.5})_2(\text{PO}_4)_2\text{F}_2/\text{graphene}$  have been presented in Figure 4c, which are deconvoluted based on the equations (2-4).

$$i_p = av^b \quad (1)$$

$$i_c = SC_d v = k_1 v \quad (2)$$

$$i_r = 2.69 \times 10^5 S n^{3/2} D_{\text{Na}}^{1/2} v^{1/2} C_{\text{Na}}^0 = k_2 v^{1/2} \quad (3)$$

$$i_p = i_c + i_r = k_1 v + k_2 v^{1/2} \quad (4)$$

Where  $i_c$  and  $i_r$  respectively represent the currents contributed by capacitive effect and intercalation reaction,  $C_d$  is specific capacitance,  $D_{\text{Na}}$  is chemical diffusion coefficient of  $\text{Na}^+$  ions in material bulk,  $S$  is surface area ( $103.95 \text{ cm}^2$ ),  $n$  is electron-transfer number,  $C_{\text{Na}}^0$  is the bulk concentration ( $0.0075 \text{ mol cm}^{-3}$ ) of Na ions,  $k_1$  and  $k_2$  represent constant numbers.

**Figure S10** shows the EIS spectra measured at various temperatures of the  $\text{Na}_3(\text{VO}_{0.5})_2(\text{PO}_4)_2\text{F}_2$  and  $\text{Na}_3(\text{VO}_{0.5})_2(\text{PO}_4)_2\text{F}_2/\text{graphene}$ . The activation energy of charge-transfer reaction can be estimated based on the equations (5-6).

$$i_o = RT / nFR_{\text{ct}} \quad (5)$$

$$i_o = Ae^{-E_a/RT} \quad (6)$$

Where  $i_o$  is the exchange current,  $A$  is a temperature-dependent coefficient,  $R$  is gas constant,  $T$  is the absolute temperature,  $F$  is Faraday constant. According to the linear relationship of  $\log(i_o)$  and  $1/T$  (the inset), the apparent activation energy of  $\text{Na}_3(\text{VO}_{0.5})_2(\text{PO}_4)_2\text{F}_2/\text{graphene}$  is calculated to be  $\sim 39.5 \text{ kJ mol}^{-1}$ , close to that of the pristine  $\text{Na}_3(\text{VO}_{0.5})_2(\text{PO}_4)_2\text{F}_2$  ( $\sim 44.2 \text{ kJ mol}^{-1}$ ). According to the knowledge of electrode reaction, it is known that the factors affecting the reaction kinetics consist of mass transfer, activation barrier and electron conductivity. Since the  $\text{Na}_3(\text{VO}_{0.5})_2(\text{PO}_4)_2\text{F}_2/\text{graphene}$  and  $\text{Na}_3(\text{VO}_{0.5})_2(\text{PO}_4)_2\text{F}_2$  possess similar barrier values, the enhanced reaction kinetics of  $\text{Na}_3(\text{VO}_{0.5})_2(\text{PO}_4)_2\text{F}_2/\text{graphene}$  should be ascribed to

the improvement of mass transfer and electron conductivity. This is consistent with our analyses in the manuscript.

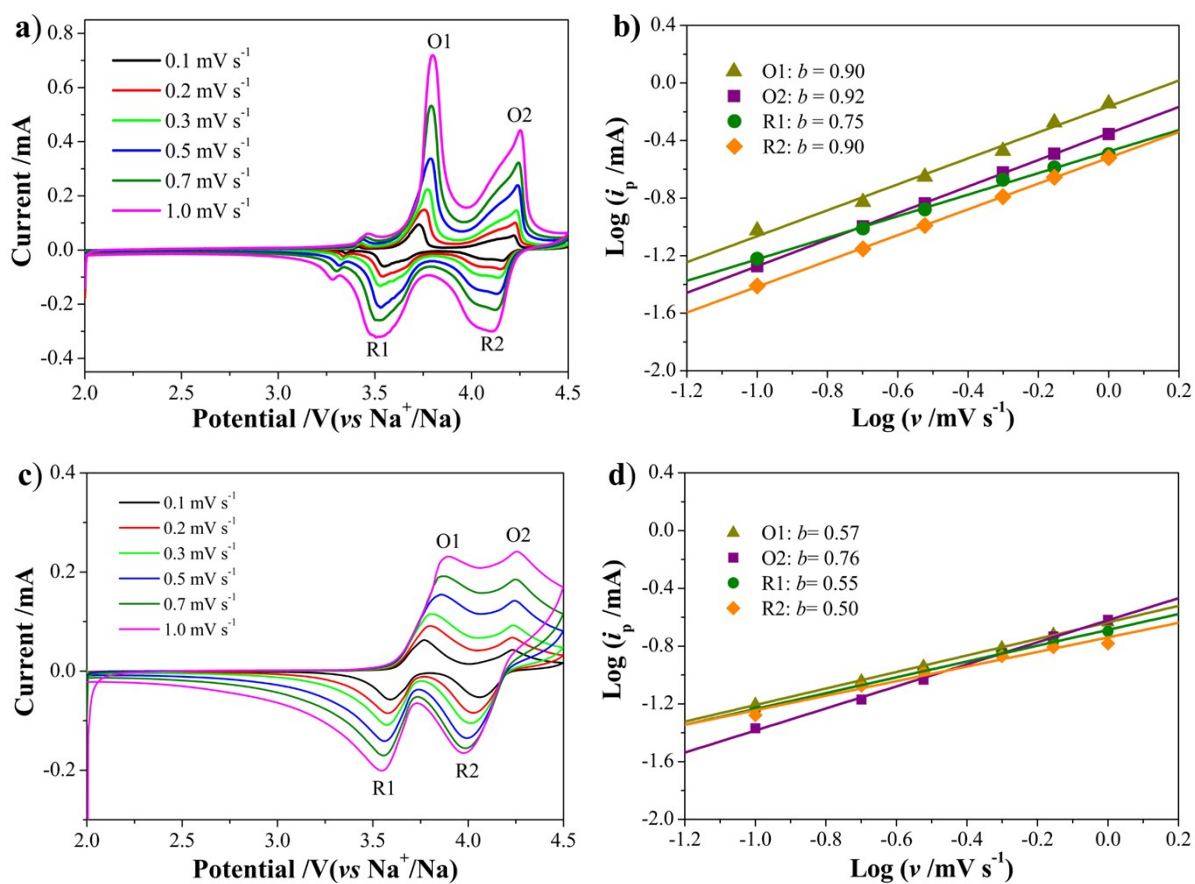

**Figure S9.** Cyclic voltammograms obtained at various scanning rates and linear relationships between  $\log(i_p)$  and  $\log(v)$  (inset) of the  $\text{Na}_3(\text{VO}_{0.5})_2(\text{PO}_4)_2\text{F}_2/\text{graphene}$  (a, b) and  $\text{Na}_3(\text{VO}_{0.5})_2(\text{PO}_4)_2\text{F}_2$  (c, d).

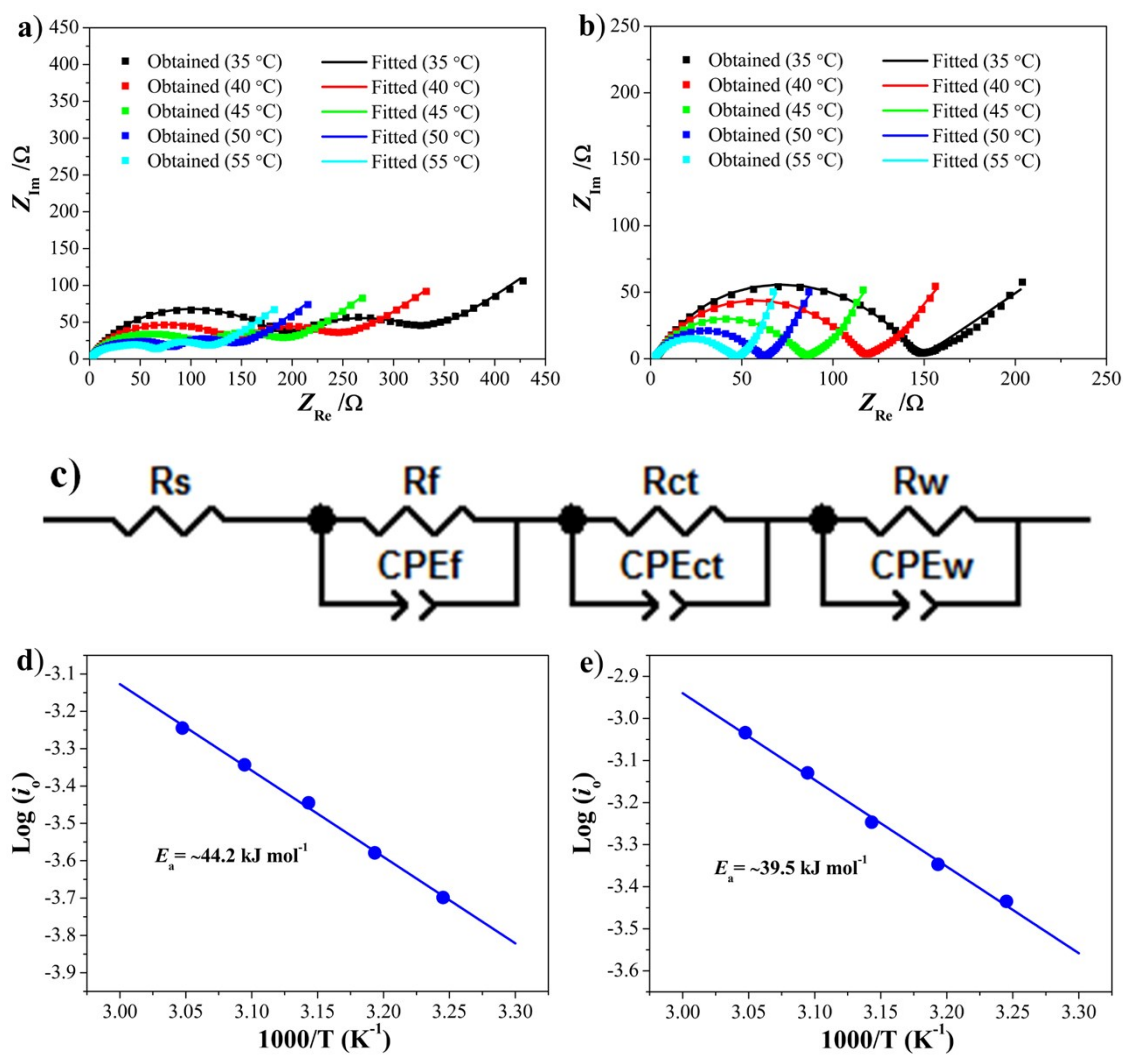

**Figure S10.** EIS spectra, equivalent circuit, and the relationship between  $\log(i_0)$  and  $1/T$  (inset) of the  $\text{Na}_3(\text{VO}_{0.5})_2(\text{PO}_4)_2\text{F}_2$  (a, c, d) and  $\text{Na}_3(\text{VO}_{0.5})_2(\text{PO}_4)_2\text{F}_2/\text{graphene}$  (b, c, e).

**Table S3.** Obtained  $R_{ct}$  values for the  $\text{Na}_3(\text{VO}_{0.5})_2(\text{PO}_4)_2\text{F}_2$  and  $\text{Na}_3(\text{VO}_{0.5})_2(\text{PO}_4)_2\text{F}_2/\text{graphene}$ .

| Temperature /°C | $\text{Na}_3(\text{VO}_{0.5})_2(\text{PO}_4)_2\text{F}_2$ | $\text{Na}_3(\text{VO}_{0.5})_2(\text{PO}_4)_2\text{F}_2/\text{graphene}$ |
|-----------------|-----------------------------------------------------------|---------------------------------------------------------------------------|
| ~30             | 164.7                                                     | 89.49                                                                     |
| 35              | 132.6                                                     | 72.25                                                                     |
| 40              | 102.3                                                     | 59.97                                                                     |
| 45              | 76.36                                                     | 48.37                                                                     |
| 50              | 61.35                                                     | 37.51                                                                     |
| 55              | 49.68                                                     | 30.56                                                                     |

### S3.3.3. Performance comparison with previous reports

**Table S4.** Performance comparison of the NVPF materials reported in literature and this work

| Material              | Particle size     | Rate performance                                                                                     | Source    |
|-----------------------|-------------------|------------------------------------------------------------------------------------------------------|-----------|
| NVPF                  | ~50 nm            | 73 mAh g <sup>-1</sup> at 10 C                                                                       | Ref. 6    |
| NVPF/RuO <sub>2</sub> | ~50 nm (diameter) | 71 mAh g <sup>-1</sup> at 40 C                                                                       | Ref. 3    |
| NVPF/MWCNTs           | ~1.5 μm           | 41 mAh g <sup>-1</sup> at 20 C                                                                       | Ref. 7    |
| NVPF@C/graphene       | ~300 nm           | 78.5 mAh g <sup>-1</sup> at 10 C                                                                     | Ref. 8    |
| NVPF/graphene         | ~300 nm           | 66 mAh g <sup>-1</sup> at 5 C                                                                        | Ref. 9    |
| NVPF/C                | ~500 nm           | 68 mAh g <sup>-1</sup> at 1 C<br>100 mAh g <sup>-1</sup> at 1 C,<br>92 mAh g <sup>-1</sup> at 5 C,   | Ref. 10   |
| NVPF/graphene         | ~30 nm            | 88 mAh g <sup>-1</sup> at 10 C,<br>82 mAh g <sup>-1</sup> at 20 C,<br>77 mAh g <sup>-1</sup> at 50 C | This work |

1. D. A. Dikin, S. Stankovich, E. J. Zimney, R. D. Piner, G. H. Dommett, G. Evmenenko, S. T. Nguyen and R. S. Ruoff, *Nature*, 2007, **448**, 457-460.
2. Z. Niu, L. Liu, L. Zhang, Q. Shao, W. Zhou, X. Chen and S. Xie, *Adv. Mater.*, 2014, **26**, 3681-3687.
3. M. H. Peng, B. A. Li, H. J. Yan, D. T. Zhang, X. Y. Wang, D. G. Xia and G. S. Guo, *Angew. Chem. Int. Ed.*, 2015, **54**, 6452-6456.
4. R. A. Shakoor, D. H. Seo, H. Kim, Y. U. Park, J. Kim, S. W. Kim, H. Gwon, S. Lee and K. Kang, *J. Mater. Chem.*, 2012, **22**, 20535-20541.
5. V. Augustyn, J. Come, M. A. Lowe, J. W. Kim, P. L. Taberna, S. H. Tolbert, H. D. Abruña, P. Simon and B. Dunn., *Nat. Mater.*, 2013, **12**, 518-522.

6. Y. Qi, L. Mu, J. Zhao, Y. S. Hu, H. Liu and S. Dai, *Angew. Chem. Int. Ed.*, 2015, **54**, 9911-9916.
7. P. R. Kumar, Y. H. Jung, C. H. Lim and D. K. Kim, *J. Mater. Chem. A*, 2015, **3**, 6271-6275.
8. H. Jin, J. Dong, E. Uchaker, Q. Zhang, X. Zhou, S. Hou, J. Li and G. Cao, *J. Mater. Chem. A*, 2015, **3**, 17563-17568.
9. M. W. Xu, L. Wang, X. Zhao, J. Song, H. Xie, Y. H. Lu and J. B. Goodenough, *Phys. Chem. Chem. Phys.*, 2013, **15**, 13032-13037.
10. P. Serras, V. Palomares, P. Kubiak, L. Lezama and T. Rojo, *Electrochem. Commun.*, 2013, **34**, 344-347.
